# Supplementary material for: Aberrant expression of PROS1 correlates with human papillary thyroid cancer progression
Source: PeerJ. 2021 Aug 3;9:e11813. doi: 10.7717/peerj.11813 (PMC8344691; doi:10.7717/peerj.11813)
Supplement: Supplemental Information 2 [file peerj-09-11813-s002.xlsx]

## Sheet: Sheet1
The clinicopathological information of patients with PTC
ID	PROS1 expression	Age	Gender	Tumor size（cm）	T classification	Lymph node metastasis	N classification	BRAF mutation	Extrathyroidal extension	Stage
1230773	High expression	60	Female	5	3	No	N0	Yes	No	Ⅱ
1225863	High expression	55	Female	1	1	No	N0	Yes	No	Ⅰ
1229531	Low expression	59	Female	1.5	1	No	N0	Yes	Yes	Ⅰ
1228493	Low expression	62	Male	1.5	1	Yes	N1	Yes	Yes	Ⅱ
1230480	Low expression	42	Female	2.3	2	No	N0	Yes	No	Ⅰ
1230359	High expression	36	Female	0.7	1	Yes	N1	Yes	No	Ⅰ
1230233	High expression	23	Male	0.7	1	Yes	N1	Yes	No	Ⅰ
1230156	High expression	37	Female	0.6	1	No	N0	Yes	No	Ⅰ
1230129	Low expression	31	Female	0.7	1	Yes	N1	Yes	No	Ⅰ
1230478	Low expression	34	Male	1.8	1	No	N0	Yes	Yes	Ⅰ
1230410	Low expression	30	Female	2.7	2	Yes	N1	Yes	Yes	Ⅰ
1230512	Low expression	46	Female	0.6	1	No	N0	Yes	No	Ⅰ
1230481	Low expression	35	Female	0.7	1	No	N0	Yes	No	Ⅰ
1230856	High expression	39	Female	1.2	1	Yes	N1	Yes	No	Ⅰ
1230762	High expression	27	Male	0.5	1	No	N0	Yes	No	Ⅰ
1230604	High expression	53	Female	0.5	1	Yes	N1	Yes	No	Ⅰ
1230597	High expression	36	Female	1.2	1	Yes	N1	Yes	No	Ⅰ
1230806	High expression	47	Female	0.5	1	No	N0	Yes	Yes	Ⅰ
1230627	Low expression	43	Female	0.5	1	No	N0	No	No	Ⅰ
1230621	High expression	45	Female	0.7	1	No	N0	Yes	Yes	Ⅰ
1230740	High expression	45	Female	0.8	1	No	N0	No	Yes	Ⅰ
1230749	Low expression	35	Female	0.6	1	Yes	N1	Yes	No	Ⅰ
1230724	Low expression	49	Female	0.6	1	No	N0	Yes	Yes	Ⅰ
1230788	Low expression	42	Male	0.6	1	No	N0	Yes	Yes	Ⅰ
1230787	Low expression	40	Female	3.2	2	Yes	N1	Yes	Yes	Ⅰ
1230754	Low expression	51	Male	2.2	2	No	N0	Yes	Yes	Ⅰ
1230758	Low expression	44	Male	2.7	2	Yes	N1	Yes	Yes	Ⅰ
1230476	Low expression	34	Male	1.8	1	Yes	N1	Yes	Yes	Ⅰ
1227258	Low expression	42	Female	1	1	Yes	N1	Yes	No	Ⅰ
1227244	Low expression	39	Female	0.5	1	Yes	N1	Yes	No	Ⅰ
1227243	Low expression	45	Female	0.8	1	Yes	N1	Yes	No	Ⅰ
1227088	Low expression	46	Male	1.2	1	Yes	N1	Yes	No	Ⅰ
1229957	Low expression	48	Female	1.5	1	Yes	N1	No	No	Ⅰ
1229176	High expression	53	Female	0.7	1	Yes	N1	Yes	No	Ⅰ
1227088	Low expression	46	Male	1.2	1	Yes	N1	Yes	No	Ⅰ
1229140	Low expression	33	Female	0.9	1	Yes	N1	Yes	No	Ⅰ
1228222	Low expression	36	Female	0.5	1	Yes	N1	Yes	No	Ⅰ
1228174	Low expression	33	Male	1	1	No	N0	No	No	Ⅰ
1228135	Low expression	49	Male	1.5	1	No	N0	Yes	No	Ⅰ
1228088	Low expression	28	Male	0.9	1	Yes	N1	No	No	Ⅰ
1228012	Low expression	23	Male	2.8	2	Yes	N1	No	Yes	Ⅰ
1227975	High expression	50	Female	0.3	1	No	N0	Yes	No	Ⅰ
1227083	High expression	51	Male	0.7	1	No	N0	Yes	Yes	Ⅰ
1226350	Low expression	46	Female	0.8	1	Yes	N1	No	No	Ⅰ
1227929	High expression	34	Female	1.2	1	No	N0	Yes	No	Ⅰ
1227624	High expression	47	Female	1.2	1	No	N0	Yes	No	Ⅰ
1227822	Low expression	42	Female	0.6	1	Yes	N1	Yes	No	Ⅰ
1227549	Low expression	49	Female	0.6	1	No	N0	Yes	No	Ⅰ
1227489	Low expression	44	Female	0.7	1	No	N0	Yes	No	Ⅰ
1226997	Low expression	43	Female	1.1	1	No	N0	Yes	No	Ⅰ
1229815	High expression	41	Female	1.5	1	No	N0	Yes	No	Ⅰ
1229814	High expression	46	Female	0.5	1	No	N0	Yes	No	Ⅰ
1229714	High expression	29	Female	0.5	1	No	N0	Yes	No	Ⅰ
1229712	High expression	50	Male	1.6	1	Yes	N1	Yes	Yes	Ⅰ
1229685	High expression	42	Female	2.5	2	Yes	N1	Yes	Yes	Ⅰ
1229679	Low expression	33	Female	0.7	1	Yes	N1	Yes	No	Ⅰ
1229678	Low expression	17	Female	1.5	1	No	N0	Yes	No	Ⅰ
1229676	High expression	41	Male	0.8	1	No	N0	Yes	Yes	Ⅰ
1229893	High expression	47	Male	0.6	1	No	N0	Yes	No	Ⅰ
1229670	High expression	37	Female	0.4	1	No	N0	Yes	No	Ⅰ
1229640	High expression	43	Female	0.7	1	No	N0	Yes	No	Ⅰ
1229611	High expression	36	Female	1.8	1	Yes	N1	Yes	No	Ⅰ
1229262	Low expression	43	Female	1.4	1	Yes	N1	Yes	No	Ⅰ
1229559	High expression	42	Female	1.6	1	Yes	N1	Yes	No	Ⅰ
1229450	High expression	51	Male	1	1	No	N0	Yes	No	Ⅰ
1229406	High expression	50	Female	0.7	1	Yes	N1	Yes	No	Ⅰ
1229954	Low expression	41	Female	0.8	1	No	N0	Yes	Yes	Ⅰ
1229405	High expression	44	Female	1.8	1	Yes	N1	Yes	No	Ⅰ
1229356	High expression	51	Female	1	1	No	N0	Yes	No	Ⅰ
1229271	High expression	48	Male	1.5	1	No	N0	Yes	No	Ⅰ
1228414	Low expression	37	Male	2	1	Yes	N1	Yes	No	Ⅰ
1228419	Low expression	35	Female	1.1	1	No	N0	Yes	No	Ⅰ
1228363	Low expression	51	Female	1.7	1	Yes	N1	Yes	No	Ⅰ
1228371	Low expression	36	Male	0.7	1	Yes	N1	Yes	No	Ⅰ
1228354	Low expression	49	Female	0.8	1	No	N0	Yes	No	Ⅰ
1228357	Low expression	33	Female	1.2	1	Yes	N1	Yes	Yes	Ⅰ
1228313	Low expression	38	Male	0.7	1	Yes	N1	Yes	Yes	Ⅰ
1228321	High expression	28	Female	0.8	1	Yes	N1	Yes	No	Ⅰ
1226954	Low expression	33	Female	1.5	1	Yes	N1	No	No	Ⅰ
1226980	Low expression	43	Female	0.8	1	No	N0	Yes	No	Ⅰ
1226926	Low expression	39	Male	0.5	1	Yes	N1	Yes	No	Ⅰ
1226944	High expression	42	Female	0.9	1	No	N0	Yes	Yes	Ⅰ
1226834	High expression	29	Female	1.5	1	No	N0	Yes	Yes	Ⅰ
1226909	Low expression	16	Female	1.4	1	Yes	N1	Yes	No	Ⅰ
1226334	Low expression	39	Female	0.8	1	No	N0	Yes	Yes	Ⅰ
1226340	Low expression	51	Female	1.6	1	No	N0	Yes	No	Ⅰ
1226754	Low expression	44	Female	1	1	Yes	N1	Yes	No	Ⅰ
1226832	Low expression	45	Female	0.5	1	No	N0	Yes	No	Ⅰ
1226646	Low expression	52	Female	0.8	1	No	N0	Yes	No	Ⅰ
1226696	High expression	34	Male	1.2	1	No	N0	Yes	No	Ⅰ
1226565	Low expression	44	Male	0.8	1	No	N0	Yes	No	Ⅰ
1226627	Low expression	41	Male	0.8	1	Yes	N1	Yes	No	Ⅰ
1226449	Low expression	29	Male	1	1	Yes	N1	Yes	Yes	Ⅰ
1226561	Low expression	33	Female	0.8	1	No	N0	Yes	No	Ⅰ
1226423	Low expression	41	Male	1.5	1	Yes	N1	Yes	No	Ⅰ
1226425	Low expression	34	Female	0.6	1	No	N0	Yes	No	Ⅰ
1228519	Low expression	27	Female	0.8	1	No	N0	Yes	No	Ⅰ
1226556	Low expression	31	Male	0.7	1	Yes	N1	Yes	No	Ⅰ
1228914	Low expression	34	Male	1.1	1	No	N0	Yes	No	Ⅰ
1228925	High expression	42	Female	0.6	1	No	N0	Yes	No	Ⅰ
1226119	Low expression	47	Female	0.7	1	No	N0	Yes	No	Ⅰ
1226123	Low expression	33	Female	0.7	1	Yes	N1	Yes	No	Ⅰ
1226085	Low expression	45	Female	1.7	1	No	N0	Yes	No	Ⅰ
1226114	Low expression	50	Female	1	1	No	N0	Yes	No	Ⅰ
1226051	Low expression	48	Female	1.2	1	Yes	N1	Yes	No	Ⅰ
1226052	Low expression	28	Male	1	1	Yes	N1	No	No	Ⅰ
1228229	Low expression	28	Male	1	1	Yes	N1	Yes	No	Ⅰ
1228484	Low expression	39	Female	0.9	1	No	N0	Yes	No	Ⅰ
1228516	Low expression	30	Female	1.1	1	Yes	N1	Yes	No	Ⅰ
1228605	High expression	50	Female	1	1	No	N0	Yes	Yes	Ⅰ
1229091	High expression	32	Female	0.7	1	No	N0	Yes	No	Ⅰ
1228251	High expression	53	Female	0.7	1	No	N0	No	No	Ⅰ
