# Supplementary material for: Aberrant expression of PROS1 correlates with human papillary thyroid cancer progression
Source: PeerJ. 2021 Aug 3;9:e11813. doi: 10.7717/peerj.11813 (PMC8344691; doi:10.7717/peerj.11813)
Supplement: Supplemental Information 7 [file peerj-09-11813-s007.xlsx]

## Sheet: Sheet1
gene	expression
PKHD1L1	DOWN
DCSTAMP	UP
KLK7	UP
GABRB2	UP
SLC34A2	UP
LOC400794	UP
MPPED2	DOWN
SPX	DOWN
TPO	DOWN
IGFBPL1	DOWN
PRR15	UP
SERPINA1	UP
DIO1	DOWN
LIPH	UP
CRABP1	DOWN
SFTPB	UP
PLA2R1	DOWN
KLK10	UP
CHI3L1	UP
CITED1	UP
IPCEF1	DOWN
HMGA2	UP
SLC26A4-AS1	DOWN
SYTL5	UP
ADH1B	DOWN
LPAR5	UP
SLC4A4	DOWN
CUX2	DOWN
CWH43	DOWN
TFF3	DOWN
DPP4	UP
TACSTD2	UP
SLC26A7	DOWN
MRO	DOWN
ALDH1A3	UP
SCEL	UP
CDKN2B	UP
TMEM171	DOWN
FN1	UP
LRP4	UP
ZCCHC12	UP
TMEM163	UP
TENM1	UP
DPP6	DOWN
CLDN10	UP
LOC646736	DOWN
ALOX5	UP
TFCP2L1	DOWN
ENTPD1	UP
AHNAK2	UP
AGR3	DOWN
SLC26A4	DOWN
LRP1B	DOWN
TCEAL2	DOWN
BMP8A	DOWN
STXBP5L	DOWN
FABP4	DOWN
RYR2	DOWN
DPT	DOWN
GPM6A	DOWN
PPARGC1A	DOWN
AVPR1A	DOWN
METTL7B	UP
KIAA1324	DOWN
ANGPTL1	DOWN
KCNJ2	UP
LIFR	DOWN
LCN2	UP
MATN2	DOWN
DGKI	DOWN
ABCC3	UP
DLG2	DOWN
ZMAT4	DOWN
FHL1	DOWN
NCAM1	DOWN
TPPP	DOWN
TNFRSF11B	DOWN
CYP1B1	UP
LRRK2	UP
CAMK2N1	UP
HLF	DOWN
BTBD11	DOWN
QPCT	UP
IRS4	DOWN
FAM20A	UP
ST6GALNAC5	UP
DTX4	UP
SMOC2	DOWN
CLDN1	UP
NRCAM	UP
MUM1L1	DOWN
CLCNKB	DOWN
WDR72	DOWN
CFAP43	DOWN
ESRRG	DOWN
IP6K3	DOWN
PKNOX2	DOWN
RUNX2	UP
PAPSS2	DOWN
LOC104968398	DOWN
FAM167A	DOWN
ITPR1	DOWN
RNF150	DOWN
AGTR1	DOWN
KIT	DOWN
DPY19L2	DOWN
PDLIM4	UP
SHANK2	DOWN
PSD3	UP
FOXQ1	UP
TIAM1	UP
ERBB3	UP
CTSC	UP
PID1	DOWN
PLCH1	DOWN
KLHDC8A	UP
SERTM1	DOWN
KCNIP4	DOWN
PROS1	UP
LMOD1	DOWN
CST6	UP
IQGAP2	DOWN
CDON	DOWN
CD55	UP
CDH16	DOWN
TNRC6C-AS1	UP
EFEMP1	DOWN
CITED2	DOWN
TUSC3	UP
PLAG1	UP
GLT8D2	DOWN
MMP16	UP
CDH3	UP
SLPI	UP
ARHGAP24	DOWN
HGD	DOWN
DUSP5	UP
RAP1GAP	DOWN
AGR2	UP
NR2F1-AS1	UP
STK32A	UP
GHR	DOWN
ABI3BP	DOWN
SORBS2	DOWN
WSCD2	DOWN
TIMP1	UP
RASSF9	DOWN
PPM1L	DOWN
PDE5A	UP
GALNT7	UP
SLC27A6	UP
PLXNC1	UP
KRT19	UP
GDF15	UP
FAM84A	UP
GABBR2	UP
MRC2	UP
FOXP2	DOWN
MT1F	DOWN
DEPTOR	DOWN
TMEM139	DOWN
CTSH	UP
LRP2	DOWN
BEX1	DOWN
FREM2	DOWN
RASSF6	DOWN
C11orf74	DOWN
LGALS3	UP
OTOS	DOWN
EPHB1	DOWN
MAMLD1	UP
FAM95C	DOWN
TMPRSS4	UP
SLITRK5	DOWN
SEL1L3	UP
HEY2	UP
LAMB3	UP
CFD	DOWN
AOX1	DOWN
AKR1C2	DOWN
AADACP1	DOWN
THRSP	UP
IRS1	DOWN
FAXC	UP
COL1A1	UP
SDPR	DOWN
CENPJ	DOWN
FRMD3	UP
HRH1	UP
RXRG	UP
KIAA1456	DOWN
C16orf89	DOWN
NFE2L3	UP
NHSL2	UP
PAK3	DOWN
ANK2	DOWN
CORO2A	UP
GGCT	UP
GSTM3	DOWN
ELMO1	DOWN
KCNN4	UP
DIRAS2	DOWN
HBB	DOWN
C19orf33	UP
ZFPM2	DOWN
CCDC146	DOWN
LONRF2	UP
MET	UP
TGFA	UP
SLC1A1	DOWN
NOX4	UP
FAXDC2	DOWN
SCUBE3	DOWN
KCNQ3	UP
WASF3	DOWN
AKR1C1	DOWN
CFI	UP
NOD1	UP
EPPK1	UP
CSGALNACT1	DOWN
CTH	DOWN
TFPI	DOWN
AIF1L	DOWN
DIO2	DOWN
COL8A1	UP
ADGRA3	DOWN
SLC25A33	DOWN
ALDH1A1	DOWN
TTC30A	DOWN
TBC1D4	DOWN
MPZL2	UP
WWOX	DOWN
LAYN	DOWN
RPS6KA6	DOWN
SPTBN2	UP
BID	UP
FCGBP	DOWN
MAMDC2	DOWN
UBE2QL1	UP
PTPRE	UP
TNFRSF21	UP
GATM	DOWN
2020-03-02	DOWN
ADAM22	DOWN
SDC4	UP
UNC5B	UP
MXRA8	UP
PEG3	DOWN
MDH1B	DOWN
TPD52L1	UP
FLRT2	DOWN
RGS8	DOWN
DYNLRB2	DOWN
LINGO2	DOWN
COL13A1	UP
DDB2	UP
TCF7L1	DOWN
COL23A1	DOWN
EPHA3	DOWN
P4HA2	UP
GJB6	DOWN
ACACB	DOWN
STARD13	DOWN
CECR2	DOWN
CCDC85A	DOWN
TXNL1	DOWN
CDH6	UP
ANO5	DOWN
SMAD9	DOWN
UGT8	DOWN
PDZK1IP1	UP
RAB27A	UP
DUSP4	UP
LRIG1	DOWN
VLDLR	DOWN
NRP2	UP
C4orf48	UP
FMOD	DOWN
CLMN	DOWN
SPINT1	UP
MLF1	DOWN
CDC42EP3	UP
SELENBP1	DOWN
KY	DOWN
CCL21	DOWN
RGS16	DOWN
TLE4	DOWN
CA4	DOWN
DUSP6	UP
NPC2	UP
COL8A2	UP
ADGRV1	DOWN
TYMS	UP
AGPAT4	DOWN
CHST2	UP
GOLT1A	UP
RYR1	UP
FZD8	DOWN
PRSS23	UP
GPR83	DOWN
TNIK	UP
LEMD1	UP
CXCL12	DOWN
MMRN1	DOWN
TGFBR1	UP
EPS8	UP
BCL2	DOWN
C1QTNF7	DOWN
MAFB	DOWN
PBX4	DOWN
PLA2G7	DOWN
COMP	UP
ANKRD37	DOWN
ID4	DOWN
TNS3	DOWN
SORD	DOWN
PFKFB2	DOWN
MACC1	UP
ARMCX3	UP
DIRAS3	UP
CPNE4	UP
CCND1	UP
TNFSF15	UP
PLEKHH1	DOWN
OGDHL	DOWN
TMEM178A	DOWN
GJB3	UP
WFS1	DOWN
ETV5	UP
GALE	UP
SGK223	DOWN
IER5L	UP
SHC3	UP
EMILIN2	UP
HBA2	DOWN
IGF2BP2	UP
S100A11	UP
TLE1	DOWN
IL17RD	UP
NGEF	UP
CNTN3	DOWN
GLDC	DOWN
MT1M	DOWN
LPL	UP
CKS2	UP
TMC6	UP
ATP2C2	DOWN
