# Supplementary material for: Aberrant expression of PROS1 correlates with human papillary thyroid cancer progression
Source: PeerJ journal article supplement (doi:10.7717/peerj.11813), 2021-08-03

The expression of PROS1  
 $\text{Log}_2(\text{TPM}+1)$

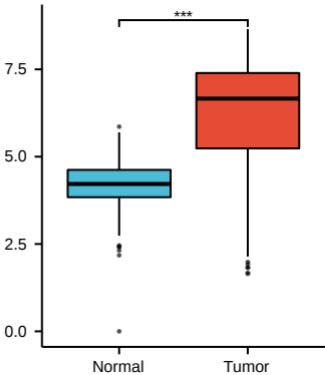

Supplement: Supplementary_Fig_2.pdf [file Supplementary_Fig_2.pdf]
